# Supplementary material for: Transcriptome Sequencing and Metabolism Analysis Reveals the role of Cyanidin Metabolism in Dark-red Onion (Allium cepa L.) Bulbs
Source: PubMed Central journal article supplement (PMC6148220; doi:10.1038/s41598-018-32472-5), 2018-09-20
Supplement: 41598_2018_32472_MOESM1_ESM.pdf [file 41598_2018_32472_MOESM1_ESM.pdf]

# **Transcriptome Sequencing and Metabolism Analysis Reveals the role of Cyanidin Metabolism in Dark-red Onion (*Allium cepa* L.) Bulb**

Chunsha Zhang<sup>1</sup>, Xiaojie Li<sup>1</sup>, Zongxiang Zhan<sup>2</sup>, Linjiao Cao<sup>3</sup>, Aisong Zeng<sup>4</sup>, Guojun Chang<sup>5</sup> and Yi Liang<sup>1</sup>

<sup>1</sup>Beijing Vegetable Research Center, Beijing Academy of Agriculture and Forestry Sciences/ Key Laboratory of Biology and Genetic Improvement of Horticultural Crops (North China), Beijing100097, China

<sup>2</sup>National Key Laboratory of Crop Genetic Improvement and College of Plant Science and Technology, Huazhong Agricultural University, Wuhan430070, China

<sup>3</sup>Horticulture College, Henan Agricultural University, Zhengzhou 450002, China

<sup>4</sup>Key Laboratory for Horticultural Crop Genetic Improvement/Institute of Vegetable Crops, Jiangsu Academy of Agricultural Sciences, Nanjing210014, China

<sup>5</sup>Vegetable Research Institute, Jiuquan Academy of Agricultural Sciences, Jiuquan 735000, China

Correspondence and requests for materials should be addressed to Y. L. (liangyi@nercv.org)

**Supplementary Figure S1.** HPLC chromatograms of the dark-red and white bulb of onion. (A) The chromatogram of flavonoids in the dark-red and white bulb of onion. Dihydrokaempferol (DHM) ; Myricetin (My) ; Quercetin (Qu); kaempferol (Km) (B) The chromatogram of anthocyanins in the dark-red and white bulb of onion. 1, Delphinidin 3-diglycoside 2, cyanidin 3-malonoylucoside; 3, cyanidin 3-glucoside; 4, delphinidin 3-glucoside; 5, delphinidin aglycon. The black, pink and blue line represents dark-red, white bulb of onion and standard of sample, respectively.

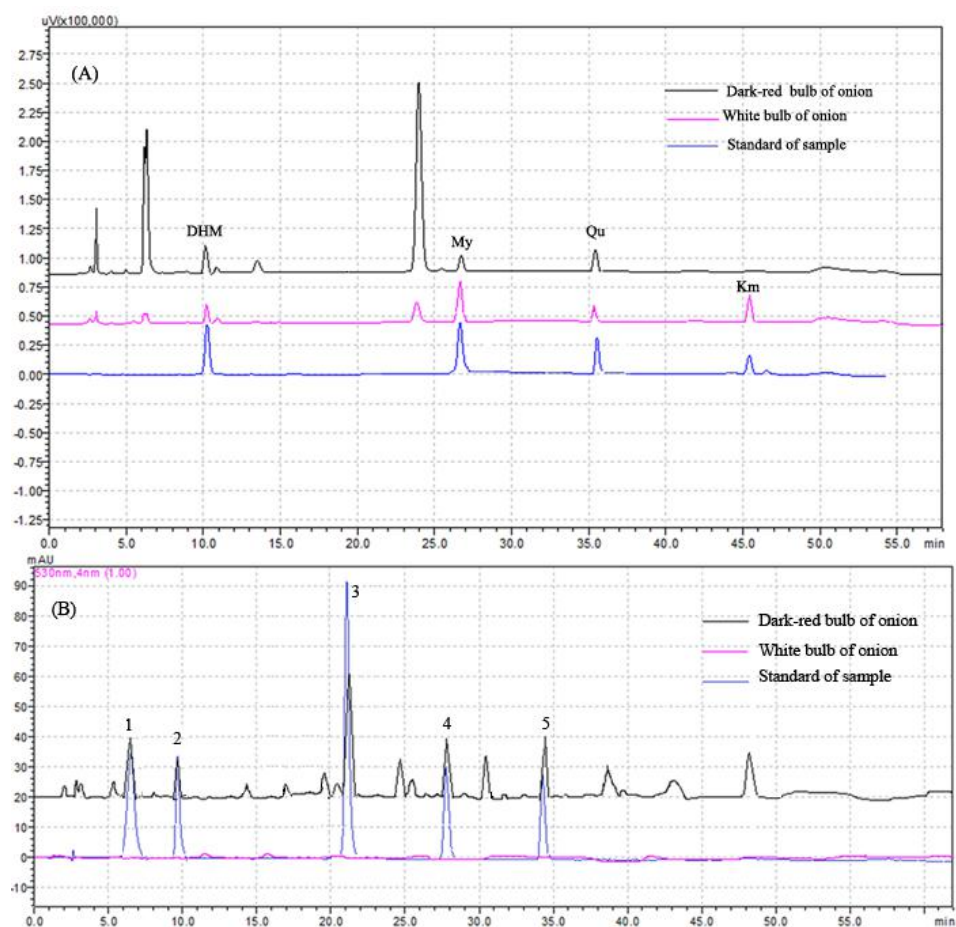

**Supplementary Table S1** Two different color onion anthocyanin and flavonoids content (mean±SD, n=3)

|                      | Standard          | Dark-red onion | White onion |
|----------------------|-------------------|----------------|-------------|
| Anthocyanins(mg g-1) | Delphindin        | 0.143±0.017    | ND          |
|                      | Cyanidin          | 0.649±0.022    | ND          |
| Flavonols (mg g-1)   | Myricetin         | 0.140±0.023    | 0.347±0.032 |
|                      | Quercetin         | 0.231±0.04     | 0.156±0.034 |
|                      | Kaempferol        | ND             | 0.421±0.028 |
|                      | Dihydrokaempferol | 0.296±0.033    | 0.035±0.022 |

ND means not detected this compounds in the onion.

**Supplementary Table S2** Sequencing data of each sample

| Sample | Read Number | Base Number   | GC Content | % $\geq$ Q30 |
|--------|-------------|---------------|------------|--------------|
| W1     | 25,465,094  | 7,574,809,134 | 43.29%     | 92.49%       |
| W2     | 32,170,124  | 9,561,335,218 | 43.39%     | 92.97%       |
| W3     | 27,383,572  | 8,131,928,180 | 43.39%     | 92.82%       |
| P1     | 23,822,626  | 7,087,829,958 | 43.80%     | 92.65%       |
| P2     | 23,045,922  | 6,849,929,194 | 43.82%     | 92.76%       |
| P3     | 29,620,569  | 8,816,608,584 | 43.69%     | 92.74%       |

**Supplementary Table S3** Length distribution of contigs, transcripts, and unigenes in bulb of the onion (*Allium cepa* L.) transcriptome

| Length Range | Contig              | Transcript     | Unigene        |
|--------------|---------------------|----------------|----------------|
| 200-300      | 31,716,169(99.55%)* | 21,254(12.80%) | 16,872(18.01%) |
| 300-500      | 64,551(0.20%)       | 33,758(20.34%) | 22,771(24.31%) |
| 500-1000     | 46,263(0.15%)       | 49,697(29.94%) | 27,174(29.01%) |
| 1000-2000    | 23,026(0.07%)       | 39,490(23.79%) | 17,782(18.99%) |
| 2000+        | 9,061(0.03%)        | 21,795(13.13%) | 9,060(9.67%)   |
| Total Number | 31,859,070          | 165,994        | 93,659         |
| Total Length | 1,311,237,265       | 176,445,502    | 84,628,953     |
| N50 Length   | 43                  | 1,567          | 1,347          |
| Mean Length  | 41.16               | 1062.96        | 903.59         |

Note: \* represent the number and percentage of the contig, transcript and unigene

**Supplementary Table S4** Key DEGs of the flavonoid synthesis in onion (*A. cepa* L.) purple bulbs

| Genes           | Annotation                              |
|-----------------|-----------------------------------------|
| c30746.graph_c0 | caffeoyl-CoA O-methyltransferase        |
| c30801.graph_c0 | dihydroflavonol 4-reductase             |
| c37537.graph_c0 | caffeoyl-CoA O-methyltransferase        |
| c37537.graph_c1 | caffeoyl-CoA 3-O-methyltransferase      |
| c37991.graph_c0 | cinammate 4-hydroxylase                 |
| c45684.graph_c0 | flavonoid 3',5'-hydroxylase             |
| c83795.graph_c0 | Chalcone isomerase                      |
| c84043.graph_c0 | flavanone 3-hydroxylase                 |
| c86129.graph_c0 | shikimate O-hydroxycinnamoyltransferase |
| c86489.graph_c0 | chalcone synthase                       |
| c91568.graph_c0 | flavonoid 3'-hydroxylase                |
| c92581.graph_c0 | flavonoid 3',5'-hydroxylase             |
| c98592.graph_c0 | flavonol synthase                       |
| c98768.graph_c0 | anthocyanidin synthase                  |
| c98910.graph_c0 | shikimate O-hydroxycinnamoyltransferase |
| c99191.graph_c0 | p-coumarate 3-hydroxylase               |

**Supplementary Figure S2.** Pedigree of a population originating from a cross between Dark-red and white onions ('Xiu Qiu' × 'Ring Master').

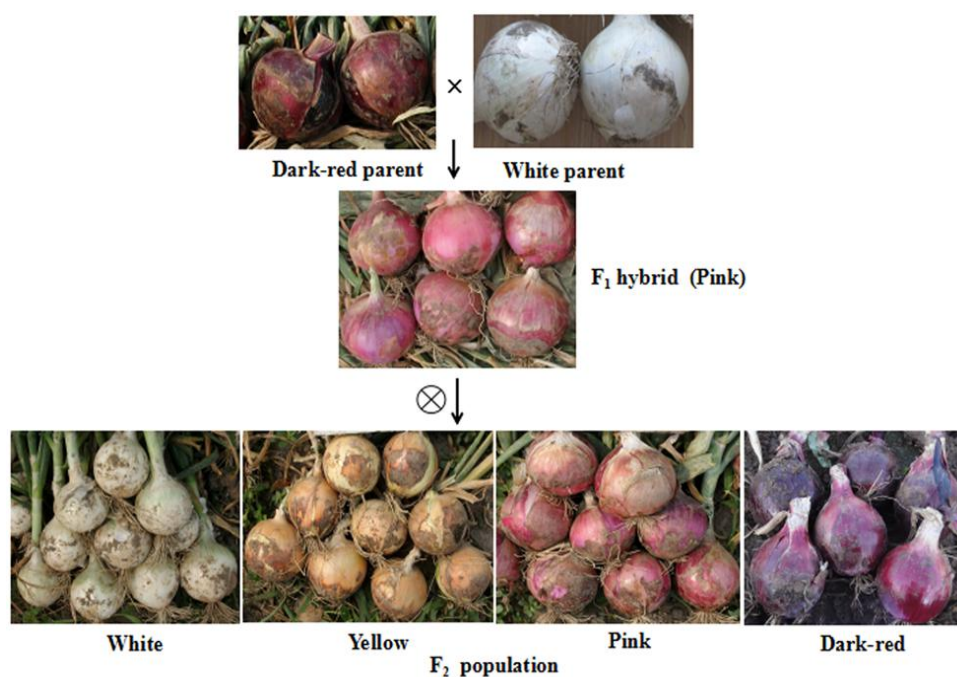

**Supplementary Table S5** The primers provided for quantitative real-time PCR

| Gene/Unigene | Forward                | Reverse                |
|--------------|------------------------|------------------------|
| c31408       | TTGAAGGCGGTAATGGAG     | CGAAAACAACCCGAACAC     |
| c83795       | AATGATTCTCCCTCTAACGG   | TTCTCAATGAGTACGCCTTC   |
| c86489       | CGGCAAGACATCGTGGTT     | ATCGCTCCTTCCGAATCC     |
| c98679       | CAACGACTCAAACAGCAAA    | CGACTGGAGAAGGGATGG     |
| c98768       | ATTCCGATAACCGACCTC     | CCAGTTTACTTCCATACCTT   |
| c95109       | CACATCCCAGACGCACTA     | TCCAACCTACAGGAACATAAGC |
| c91568       | GTCCTTTATTTGGTCTACGG   | GCCAGGCTCATTATTTTCG    |
| c92581       | TCATCCGCTTCCACTTTC     | ACATCACCAACTCCGACAG    |
| c45684       | CAGACCTACCAAATCTCCCT   | CAACGCATACTCTTCTACCAG  |
| c98592       | ACGCTAACGGCAAACCTG     | GCCTTCTTCCCTTCCAAA     |
| c84043       | AACTCCATTTCTACCCACA    | ATTCATCGCTAAACACG      |
| c98706       | TCCTTGAACATCTGAGCA     | ACCCTTCTTGAAATACGG     |
| c30801       | ATGTTCAAGCAACTCATAAGGC | TAAAGCGGAAGGGCGATA     |
